# Supplementary material for: A multi-instrumental approach for calibrating real-time mass spectrometers using high-performance liquid chromatography and positive matrix factorization
Source: Copernicus journal article supplement (doi:10.5194/ar-2-59-2024), 2024-05-08
Supplement: Supplementary file 1 [file ar-2-59-2024-supplement.pdf]

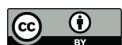

*Supplement of*

## **A multi-instrumental approach for calibrating real-time mass spectrometers using high-performance liquid chromatography and positive matrix factorization**

**Melinda K. Schueneman et al.**

*Correspondence to:* Jose L. Jimenez ([jose.jimenez@colorado.edu](mailto:jose.jimenez@colorado.edu))

The copyright of individual parts of the supplement might differ from the article licence.

1 **S1 General system information for multi-instrumental calibration method**

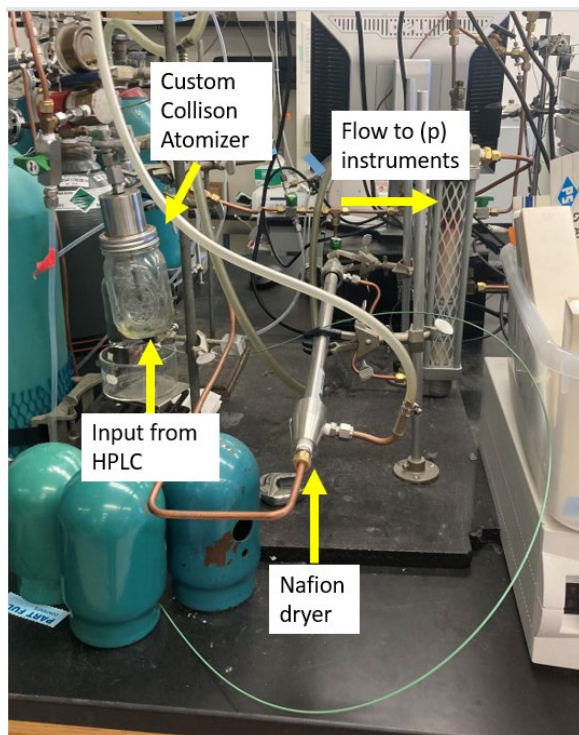

2  
3 **Figure S1. HPLC tubing into custom atomizer**

4  
5 **Table S1. Tube volumes, flows, and residence times from HPLC separation to particle instrument detection.**

| Item                                                                               | Total volume (mL) | Flow rate (flow through)   | Residence time |
|------------------------------------------------------------------------------------|-------------------|----------------------------|----------------|
| Tubing transferring liquid from after HPLC column and UV-Vis detection to atomizer | 0.67              | 1.0 mL min <sup>-1</sup>   | 40 s           |
| Atomizer                                                                           | 500               | 8.0-10 L min <sup>-1</sup> | 3.0 - 3.8 s    |
| Nafion drier                                                                       | 7.0               | ~ 8.0 L min <sup>-1</sup>  | 0.053 s        |
| Tubing before manifold                                                             | 120               | 7.2 L min <sup>-1</sup>    | 1.0 s          |
| Post manifold EESI                                                                 | 31                | 0.84 L min <sup>-1</sup>   | 2.2 s          |

|                      |    |                          |        |
|----------------------|----|--------------------------|--------|
| Post manifold AMS    | 14 | 1.5 L min <sup>-1</sup>  | 0.60 s |
| Post manifold SMPS A | 34 | 1.43 L min <sup>-1</sup> | 1.4 s  |
| Post manifold SMPS B | 29 | 1.49 L min <sup>-1</sup> | 1.2 s  |

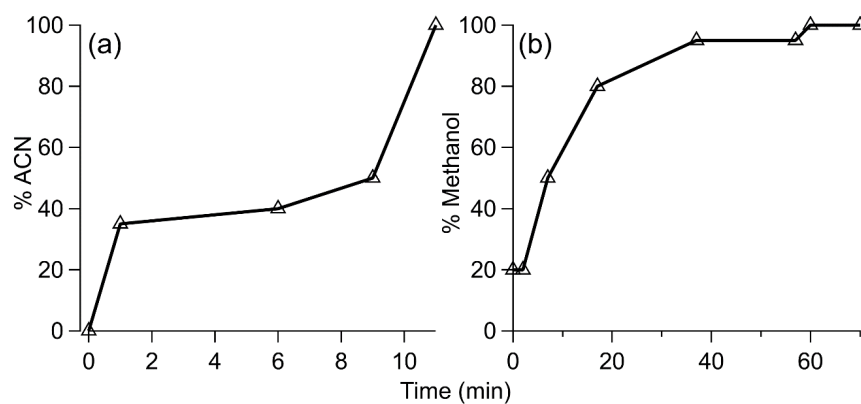

**Figure S2. Solvent gradients for (a) standard HPLC runs and (b)  $\beta$ -pinene HPLC run. The other solvent was a mixture of 95 % H<sub>2</sub>O / 5 % ACN.**

**Table S2. Standard compounds used for HPLC method demonstration, source and purity, volatility (calculated using published vapor pressures), estimated percent evaporated during transmission (from atomizer output to detection, calculated with  $C^*$  and measured OA concentration at detection), and density (using the ratio of  $d_{va}/d_m$ )**

| Species                | Source + purity                      | Saturation Mass Concentration ( $\mu\text{g m}^{-3}$ ) (T=298 K) | Estimated Percent Evaporated | Density |
|------------------------|--------------------------------------|------------------------------------------------------------------|------------------------------|---------|
| 3-methyl-4-nitrophenol | Aldrich, 98 %                        | 5,210                                                            | 92 %                         | 1.27**  |
| Phthalic acid          | Beantown Chemical, ACS grade, 99.5 % | 5.72                                                             | 0 %                          | 1.05    |
| 4-nitrophenol          | Aldrich, 99 %                        | 10,600                                                           | 94 %                         | 1.48**  |
| Succinic acid          | Aldrich, 99 %                        | 1.21                                                             | 0 %                          | 1.18    |
| 4-nitrocatechol        | Alfa Aesar, 98 %                     | 64                                                               | 63 %                         | 1.26    |
| L-malic acid           | Aldrich, 97 %                        | 0.24                                                             | -                            | 1.28    |
| Citric acid            | Fisher Scientific                    | 0.18                                                             | -                            | -       |
| Levogluconan           | Chem-Impex Int'l, $\geq 99.0$ %      | 13*                                                              | -                            | 1.30    |
| Acetonitrile           | Fisher Chemical, $> 99.95$ %         | -                                                                | -                            | -       |
| Methanol               | Fisher Chemical, $> 99.9$ %          | -                                                                | -                            | -       |
| Water                  | VWR Chemicals, HPLC grade            | -                                                                | -                            | -       |
| Ethyl Acetate          | Fisher Chemical, 99.5 %              | -                                                                | -                            | -       |

\*Reported in (Pagonis et al., 2021)

\*\*Density of bulk solution from literature

The densities measured using the  $d_{va}/d_m$  ratio do not match the literature values for bulk density well. This is potentially due to different phases from that of the bulk material, and/or non-spherical particle shape (Jayne et al., 2000; Huffman et al., 2005). Regardless, the  $d_{va}/d_m$  density was used as the best estimate here.

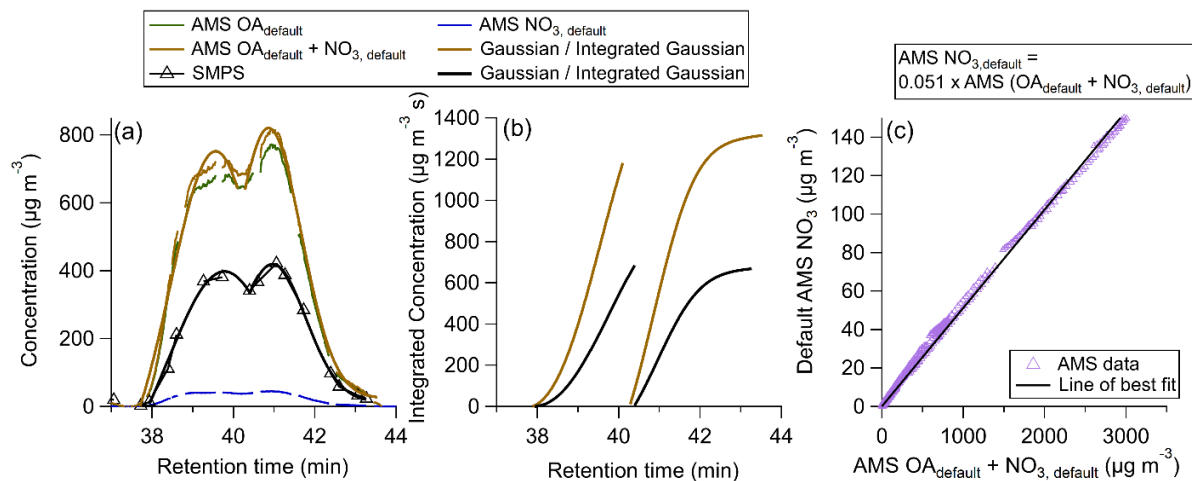

**Figure S3. (a) AMS default mass concentrations for [OA], [NO<sub>3</sub>], and [OA + NO<sub>3</sub>]; SMPS mass concentrations, corrected for the average density. (b) Integrated Gaussian curves for each peak. (c) Default AMS [NO<sub>3</sub>] vs total default AMS signal [OA + NO<sub>3</sub>], fit with a line. The slope (ratio of [NO<sub>3</sub>] / [OA + NO<sub>3</sub>]) = 0.051.**

The nitrate contribution to the total mass for this peak was  $\sim 5.1\%$ . Fitting the bulk peaks (which are composed of multiple eluents) may result in some error in the nitrate contribution approximation.  $CF_x^A$  was calculated for the two peaks by referencing the AMS mass to the SMPS mass. For the first peak,  $CF_x^A = 1.97$ , for the second peak  $CF_x^A = 1.73$ .

## S2 SMPS testing and validation

### S2.1 Fast scanning operation and validation

The fast scanning operation of the SMPSs was essential here. A “fast scan” here means 30 s for voltage scanning, with 10 s retrace time (when the voltage is returned back to 0). This allows for an SMPS data point to be obtained every 40 s, and when two SMPSs are used with interleaved timing, every  $\sim 20$  s. This faster scanning is not without precedent; one paper published in 1990 first denoted the term “scanning electrical mobility spectrometer” or SEMS (Wang and Flagan, 1990). In that paper, researchers demonstrated that aerosol distributions for atmospherically relevant samples could be measured in a 30 s scan time, with a 30 s retrace time. This research led to the creation of new SMPSs that, like the SEMS, scanned continuously, and thus would be capable of 30 s scanning times. A study a few years later put this to the test, and looked at the impact of changing SMPS scan times, and found that shorter scan times led to more smearing (less-resolved size distributions) and lower peak maximas (Russell et al., 1995). They suggest that this is driven by the residence time of the particles from the output of the DMA to the optical detection by the CPC ( $t_d$ ). In addition, a paper in 2002 elaborated on the conclusions from Russell et. al. (1995), and found that when scanning with a flow rate of  $0.3 \text{ L min}^{-1}$ , combined with a 30 s scan time, the size distribution was significantly broadened (Collins et al., 2002). The maximum concentration was decreased by over 50 % when compared to a longer scan time (300 integrated concentration did not seem as affected, due to broadening in the faster scan).

Typically, SMPSs are run at longer scan times of 2 min or more (Sioutas, 1999; McMurry, 2000; Jeong and Evans, 2009). One study modified an SMPS by adding an aerosol particle mass analyzer (APM). With the modified system, data points were recorded every 60 s (Malloy et al., 2009). Another study, which took place on an aircraft and measured the air over Mexico City, ran their SMPS with a scan time of 1.5 min (DeCarlo et al., 2008). Despite the conclusions of Wang and Flagan (1990), many in the community run their SMPSs as “slow” (e.g. scan times of two or more min) instruments. Henceforth, “slow” will refer to the 2 min scans, and “fast” will refer to the 30 sscans.

Here, we test each SMPS with a combination of “long” scans (2 min scans, 15 s retrace,  $3 \text{ L min}^{-1}$  sheath flow) and “fast” scans (30 s scans, 10 s retrace,  $6 \text{ L min}^{-1}$  sheath flow). In order to assess the usability and accuracy of the fast scan method, tests were carried out (Fig. S4) to compare the total integrated volume concentration, number size distributions, and volume size distributions for 2 min scans at both a sample flow of  $0.3 \text{ L min}^{-1}$  and  $1.5 \text{ L min}^{-1}$ , and 30 s scans done with the same flow rates.

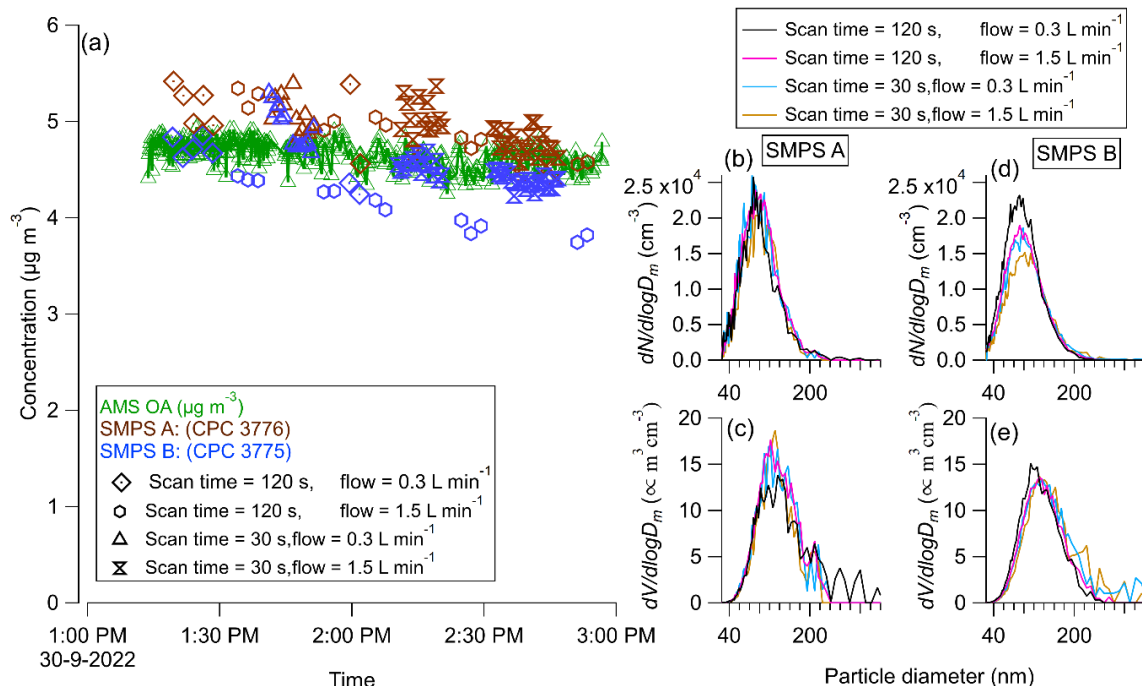

**Figure S4. (a) Estimated particle mass concentration from SMPS A and B compared to the total OA measured by the AMS, for different combinations of scanning times and sample flow rates when sampling constant DOS concentrations from a large chamber. (b) Number distribution comparisons for different combinations of scanning times and flow rates for SMPS A, (c) Volume distribution comparisons, (d) number distribution comparisons for SMPS B, and (e) volume distribution comparisons for SMPS B.**

In Fig. S4a, the total concentration of dioctyl sebacate (DOS) was measured by an AMS (green) and time averaged to 10 s. The AMS measured DOS (after AMS calibration for that species) was used as the reference concentration. DOS was generated using a custom evaporation-condensation apparatus (Sinclair and La Mer, 1949; Krechmer et al., 2017), and flowed into a 20 m<sup>3</sup> Teflon chamber. To start, we scanned with both SMPSs set to a 2 min scan time with a 15 s retrace time, and a flow rate of 0.3 L min<sup>-1</sup>. This is typically how we run our SMPSs for laboratory studies and we have compared with even longer scans (up to 300 s, same flow settings) showing good agreement (Liu et al., 2019) and has shown good quantitative agreement for intercomparisons during chamber and field campaigns. Those “long scans” serve as a reference. Both SMPSs were run concurrently.

Some researchers show peak smearing when using faster scan times (although, those studies seem to use a sample flow rate=0.3 L min<sup>-1</sup>) (Russell et al., 1995). These studies posit that the smearing is mainly due to instrument specific/plumbing delay times from the output of the DMA to the optical detection by the CPC (Russell et al., 1995). In Fig. S4b, the number distribution is shown for the different flow / scan time configurations for the SMPS A. The black distribution for all scans is the reference (120 s scan, 0.3L min<sup>-1</sup>, resolution=10). For the

number distribution, the peak width for the reference is more narrow than for all other configurations. The difference is minor, however, and not as large as in other reports.

In Fig. S4c, the volume distributions are compared. The reference scan has a lower maximum concentration than the other configurations, which seems to go against previously published results. Over time, [DOS] measured by the AMS decreases, due to chamber wall loss effects. To counter this, reference scans (120 scans,  $0.3 \text{ L min}^{-1}$  flows) are carried out throughout the experiment. For reference, the SMPSs were run with 30 s scans and  $1.5 \text{ L min}^{-1}$  sample flows for the HPLC method proposed in the main text.

The distributions for SMPS B are more affected by the different configurations. This is unsurprising, as it has a longer  $t_d$  than SMPS A (table S3), and likely is more representative of the systems studied in the research cited above. In Fig. S4d, the number distribution for the reference scan has a higher maximum than the other scans. The faster, high flow scan is the most different from the reference, and has both a lower maxima and a wider peak width (resolution = 4). This matches previous findings (Collins et al., 2002), but this study shows a far less dramatic peak shape difference than that shown therein. This finding could introduce some quantification error. In Fig. S4, the volume distributions match fairly well for all configurations. A faster instrument (such as an optical particle counter) would be ideal to obtain faster measurements, but the small diameter particles produced by the Collison atomizer makes running those instruments impractical and prone to error (due to low detection efficiency at smaller size particles).

For the multi-instrumental calibration experiments, SMPS A and SMPS B were offset by 20 s. That allowed us to obtain a volume concentration every approx. 20 s. For comparing the response between the two SMPSs, an experiment was done where SMPS A and SMPS B were run concurrently (Fig. S5). SMPS A and SMPS B are shown to match within  $\sim 0\% - 10\%$  (at the maxima). The consistency observed in Fig. S5 between SMPS A and SMPS B provides increased confidence in the use of each instrument in “fast” mode.

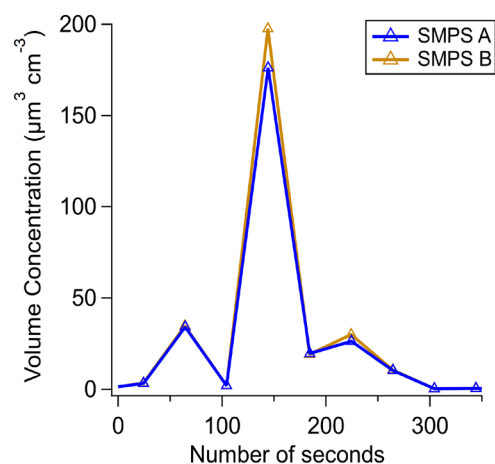

**Figure S5. Concurrent SMPS scans for an HPLC run**

## S2.2 SMPS delay time calculations

Delay times from the aerosol sampling manifold to the DMAs were calculated by running each DMA to size select particles with a mobility diameter of 115 nm. Following transmission, the time it takes for the CPC concentration to reach half of its maximum concentration ( $t_{1/2}$ ) was calculated (table S3). Here, delay times were short, due to the high sample flow. This does not eliminate the importance of having accurate delay times. Fast scans are often prone to more error than their slow counterparts.

To calculate  $t_d$  (table S3), polystyrene latex spheres (PSLs) of a known diameter were atomized and measured by the SMPSs. Calculating delay times ( $t_{1/2}$  and  $t_d$  [delay time from exit of the DMA to the CPC]) allowed us to properly align the slower SMPS measurements with the fast mass spectrometer measurements during the relatively short chromatographically-separated compound peaks. Each eluting HPLC peak is only approx. 1.5 min long, and the instruments are run at different time resolutions. Each SMPS collects one data point every 40 s. For each data point, the SMPS software provided an uncorrected scanning start time. During the 40 s scan, concentrations can change significantly. If the SMPS scan starts 15 s before the maxima is reached, then the scan is recording concentrations at particle diameters both before, during, and after the peak maxima. If the SMPSs were not corrected for their delay times, then the SMPS data point would show an erroneously low / high concentration, and lead to errors when comparing to the other instruments.

**Table S3. Delay times for each SMPS.  $t_{1/2}$  is the time it takes for the CPC concentration to reach half of its maximum concentration**

| SMPS name | CPC type | Delay time ( $t_{1/2}$ ) (s) | DMA to CPC delay time ( $t_d$ ) (s) |
|-----------|----------|------------------------------|-------------------------------------|
| SMPS A    | 3776     | 10.5                         | 0.43                                |
| SMPS B    | 3775     | 8                            | 1.55                                |

### S3 Standard mixture mass spectra comparison for direct and multi-instrumental calibrations factors

Mass spectra were obtained from PMF for many of the standards used in Sect. 3.2 and compared against the average mass spectra from direct calibrations (Fig. S6).

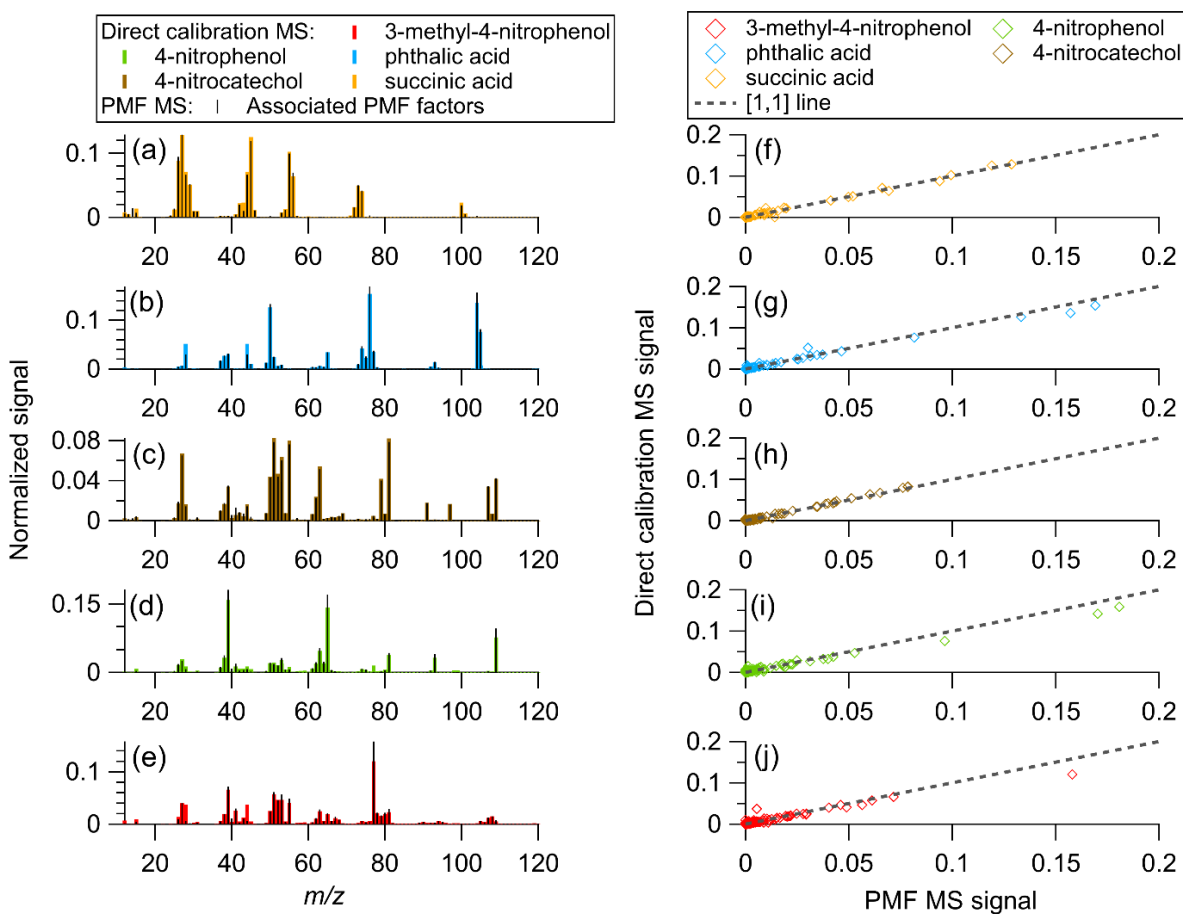

**Figure S6. (Aa) - (e) Mass spectra for monodisperse calibrations and associated PMF factors for species directly calibrated. (f)-(j) scatter plot of MS signal at each measured  $m/z$  for the direct calibrations vs the PMF mass spectra.**

The uncentered correlation coefficients (table S4) match well between the assigned PMF factor mass spectra and the corresponding direct calibration mass spectra.

**Table S4. Uncentered correlation coefficient (UC) between AMS direct calibration and PMF factor mass spectra (Ulbrich et al., 2009)**

|                        | <b>Direct calibration MS</b> |                 |               |               |                        |
|------------------------|------------------------------|-----------------|---------------|---------------|------------------------|
| <b>PMF factor MS</b>   | Succinic acid                | 4-nitrocatechol | Phthalic acid | 4-nitrophenol | 3-methyl-4-nitrophenol |
| Succinic acid          | <b>0.99</b>                  | 0.38            | 0.14          | 0.15          | 0.30                   |
| 4-nitrocatechol        | 0.38                         | <b>1.0</b>      | 0.23          | 0.49          | 0.62                   |
| Phthalic acid          | 0.094                        | 0.20            | <b>0.99</b>   | 0.24          | 0.31                   |
| 5-nitrophenol          | 0.10                         | 0.43            | 0.24          | <b>0.99</b>   | 0.45                   |
| 3-methyl-4-nitrophenol | 0.21                         | 0.58            | 0.27          | 0.49          | <b>0.96</b>            |

The UC provides the same information as the dot product, without the need to normalize the mass spectra. For all species, the UC > 0.95. For 4-nitrocatechol, the UC rounded up to 1.0 (near perfect agreement).

Similarly to the process carried out above, the mass spectra from the PMF solution for the data shown in Fig. 6 was compared to direct calibrations (Fig. S7).

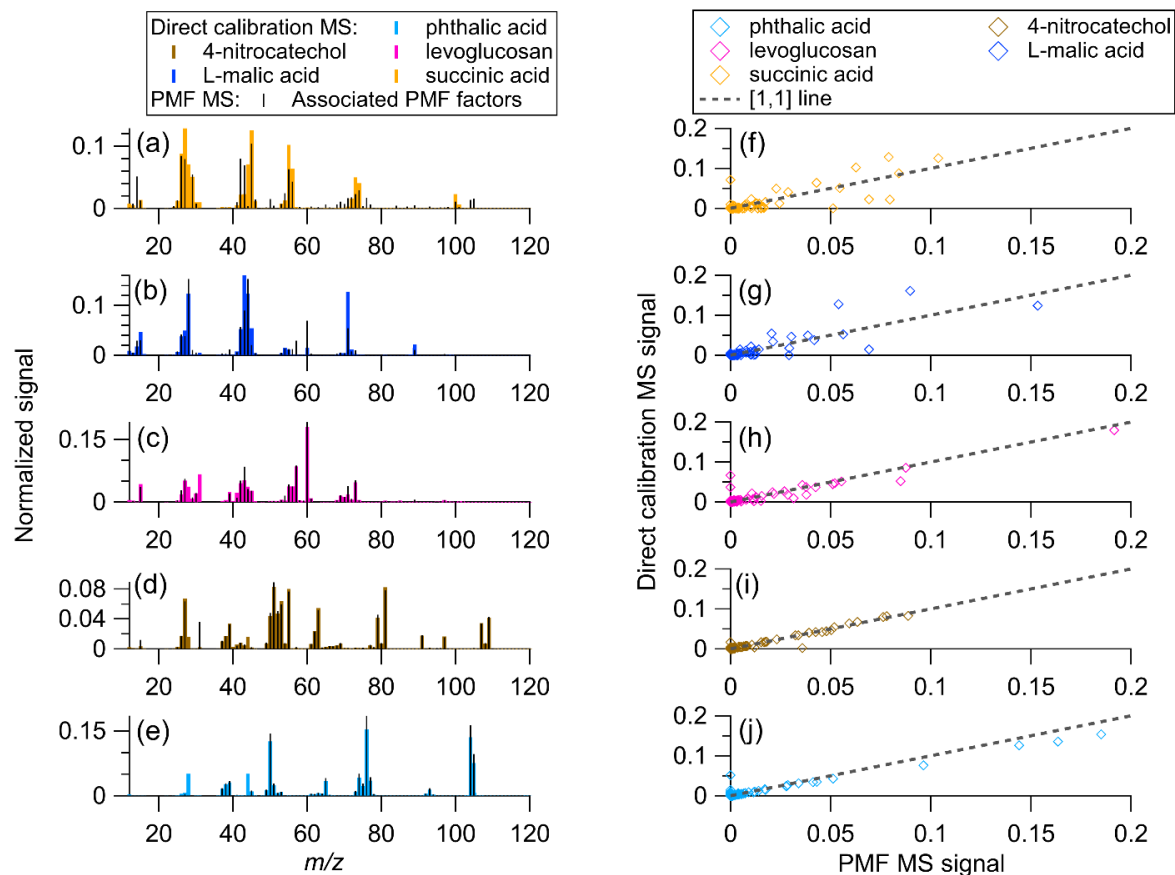

**Figure S7. (a) - (e) Mass spectra for monodisperse calibrations and associated PMF factors for species directly calibrated for the second standard solution (Fig. 6). (f) - (j) scatter plot of MS signal at each measured  $m/z$  for the direct calibrations vs the PMF mass spectra.**

Uncentered correlation coefficients were also calculated (table S5) and generally showed less agreement than those shown in table S4.

154 **Table S5. Uncentered correlation coefficient (UC) between AMS direct calibration and PMF factor mass**  
155 **spectra (Ulbrich et al., 2009) for standard solution 2 (Fig. 6, Fig. S7)**

|                      | <b>Direct<br/>calibration MS</b> |              |              |                 |               |
|----------------------|----------------------------------|--------------|--------------|-----------------|---------------|
| <b>PMF factor MS</b> | Succinic acid                    | L-malic acid | Levogluconan | 4-nitrocatechol | Phthalic acid |
| Succinic acid        | <b>0.81</b>                      | 0.50         | 0.35         | 0.31            | 0.17          |
| L-malic acid         | 0.55                             | <b>0.89</b>  | 0.60         | 0.20            | 0.23          |
| Levogluconan         | 0.36                             | 0.41         | <b>0.93</b>  | 0.19            | 0.029         |
| 4-nitrocatechol      | 0.33                             | 0.12         | 0.23         | <b>0.98</b>     | 0.20          |
| Phthalic acid        | 0.030                            | 0.014        | 0.025        | 0.19            | <b>0.96</b>   |

156

157 Levogluconan, 4-nitrocatechol, and phthalic acid match well (UC > 0.9). Succinic acid and L-malic acid match less  
158 well, but still have a UC > 0.8. As expected, the UC's for the second standard solution are less good than those for  
159 the first standard solution (which was almost entirely resolved even without PMF).

#### S4 $\beta$ -pinene detailed information: density, molecular identification, PMF solution, and peak fitting

For the SOA samples, the effective density was calculated as described in Sect. 2.5.2, shown in Fig. S8.

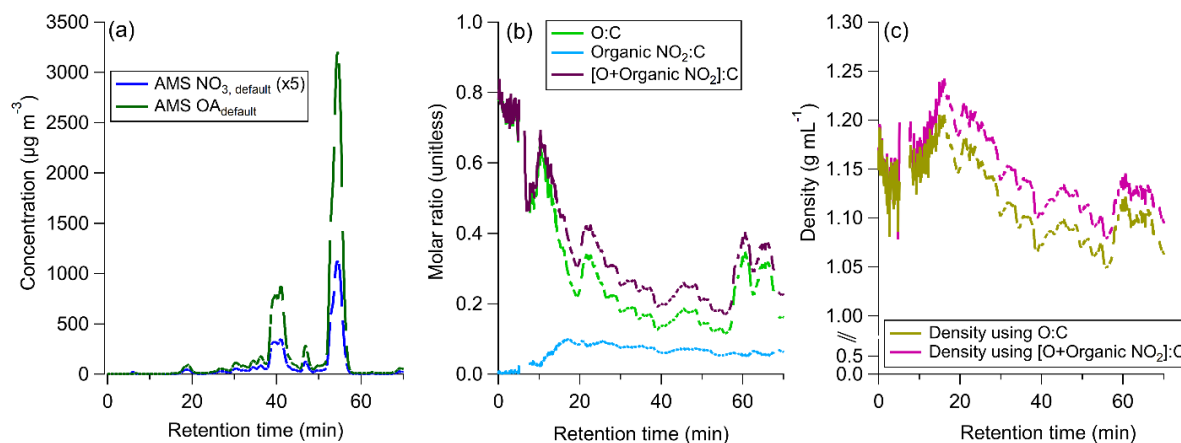

**Figure S8. (a) Measured  $\text{NO}_3$  and OA from the AMS when sampling  $\beta$ -pinene +  $\text{NO}_3$  SOA. (b) Atomic ratios for organic nitrate : carbon, oxygen to carbon, and oxygen + organonitrates to carbon. (c) Estimated density from two approaches.**

The chromatogram from Claflin and Ziemann (2018) was compared to that measured here (Fig. 7), shown below in Fig. S9.

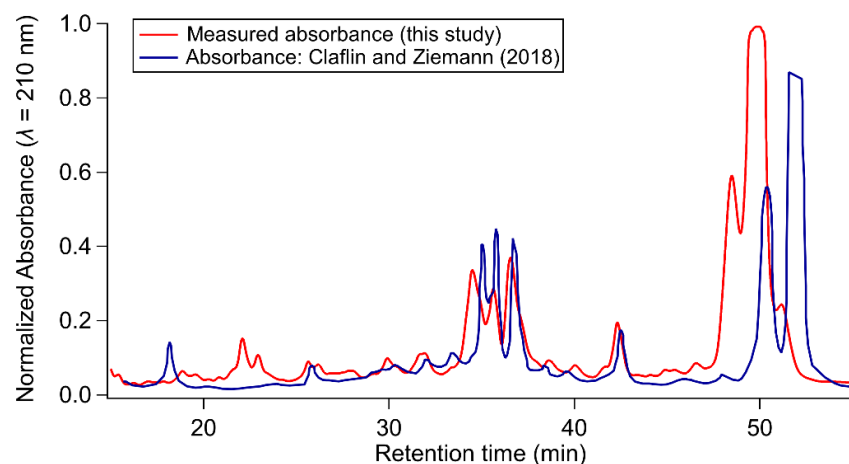

**Figure S9. Comparison to  $\beta$ -pinene +  $\text{NO}_3$  SOA chromatogram measured in Claflin and Ziemann (2018).**

The chromatograms show the same general shape, although with slightly faster elution for this work. There are some notable differences in the results between 20 - 30 min and 45 - 55 min. The final peak in the chromatogram from Claflin and Ziemann is the same peak as the largest one measured here (retention time ~ 50 min). This suggests that there could be some difference in the HPLC gradient method, or a potential contamination in one of the HPLC solvents. Despite that, the overall signals are consistent, and some of the identified species are shown in table S6.

**Table S6. Structure of some known species (from Claflin and Ziemann (2018)), exact (theoretical) mass, observed mass (measured with EESI+), and mass accuracy (based on EESI instrument multiion  $m/z$  calibration fit).**

| Structure                           | 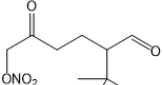 | 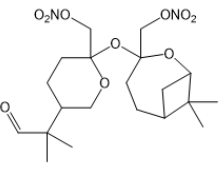 | 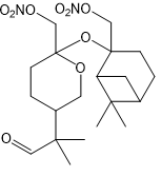 | 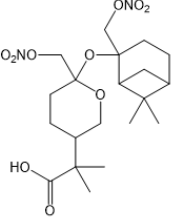 | 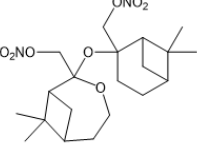 |
|-------------------------------------|-----------------------------------------------------------------------------------|-----------------------------------------------------------------------------------|------------------------------------------------------------------------------------|-------------------------------------------------------------------------------------|-------------------------------------------------------------------------------------|
| MW                                  | 245.23                                                                            | 460.48                                                                            | 444.48                                                                             | 460.48                                                                              | 428.48                                                                              |
| Exact mass (+Na <sup>+</sup> ) (Da) | 268.0797                                                                          | 483.1955                                                                          | 467.2002                                                                           | 483.1955                                                                            | 451.2056                                                                            |
| Detected mass (Da)                  | 268.0879                                                                          | 483.1885                                                                          | 467.2032                                                                           | 483.1885                                                                            | 451.2120                                                                            |
| Mass Accuracy (ppm)                 | 30.6                                                                              | -14.5                                                                             | 6.42                                                                               | -14.5                                                                               | 14.2                                                                                |

PMF was run on the AMS data, shown below for the entire HPLC run (Fig. S10).

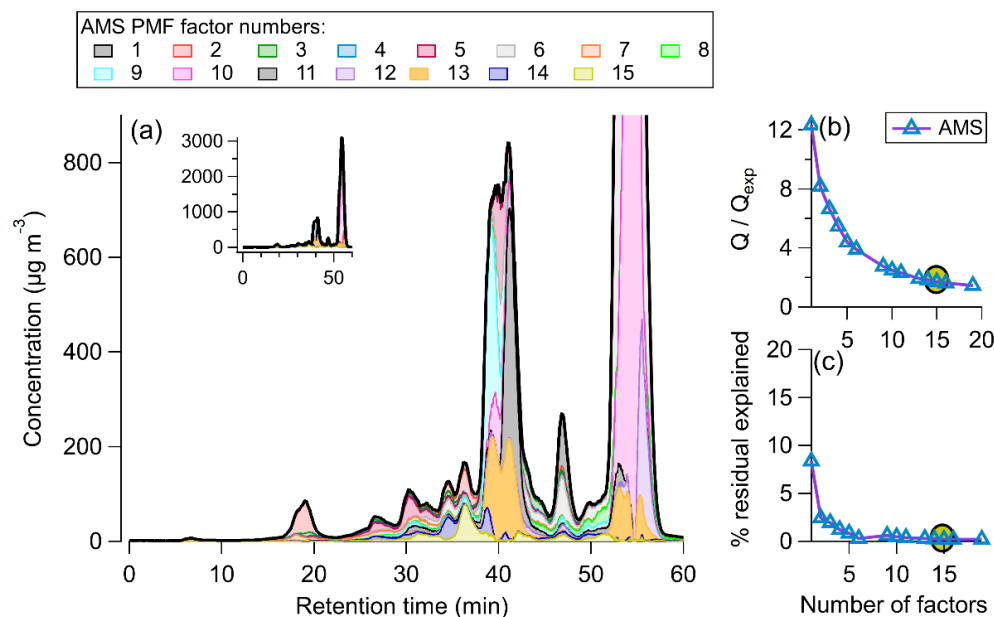

**Figure S10. (a) stacked plot showing AMS PMF solution time series for the  $\beta$ -pinene +  $\text{NO}_3$  SOA system, with inset showing full scale. (b)  $Q / Q_{\text{exp}}$ , with the chosen solution (15 factors) circled. (c) Percent of the total sum of the residuals explained, 15 factor solution circled.**

A 15 factor solution was chosen. The time series and mass spectra for each factor are shown in Fig. S11. The AMS signal during the  $\beta$ -pinene +  $\text{NO}_3$  HPLC experiment was high, ranging from  $\sim 100$  -  $4000 \mu\text{g m}^{-3}$ . For low volatility species, these high concentrations are not necessary. However, in many systems, the volatility of the produced products will range many orders of magnitude in  $C^*$ . To best calibrate for low-volatility and semi-volatile products, higher concentrations of SOA should be injected into the column. For the  $\beta$ -pinene+ $\text{NO}_3$  SOA that was shown here, the chamber experiment (as discussed in Claflin and Ziemann, 2018), started with the addition of  $\sim 200 \mu\text{g m}^{-3}$  ammonium sulfate seed, 1 ppm of  $\beta$ -pinene, and 0.3 ppm  $\text{N}_2\text{O}_5$  (in an  $8.0 \text{ m}^3$  Teflon FEP chamber). All of the  $\text{N}_2\text{O}_5$  was reacted, meaning  $\sim 0.3$  ppm of  $\beta$ -pinene was reacted. The amount of SOA formed can be calculated using the known SOA yields, concentrations, and flow rates.

First, 0.3 ppm  $\beta$ -pinene is converted into a mass concentration. Following this step, the mass concentration is multiplied by the known SOA yield (Eq. S1)

$$\text{SOA yield} = \frac{\Delta \text{SOA}}{\Delta \text{VOC}} \quad \text{Eq. S1}$$

The SOA yield for this system ranges from  $\sim 27$  -  $\sim 105$  % (Boyd et al. 2015). If 30 % of the  $\beta$ -pinene reacted, then the amount of SOA was formed ranged from  $372 \mu\text{g m}^{-3}$  to  $1378 \mu\text{g m}^{-3}$ . This concentration of aerosol was then collected on a filter at a flow rate of  $14 \text{ L min}^{-1}$  for 120 min. This would imply that  $625 \mu\text{g}$  -  $2315 \mu\text{g}$  of SOA was collected on the filter. Assuming a 100 % extraction efficiency of SOA, the amount of material injected into the column can be quantified as such (Eq. S2)

$$\text{Injected mass} = \frac{\text{mass SOA}}{\text{volume ACN}} \times \text{injected volume of solution} \quad \text{Eq. S2}$$

A typical volume of acetonitrile (ACN) used would be ~ 2 mL, therefore the concentration of SOA in ACN would range from 313  $\mu\text{g mL}^{-1}$  - 1158  $\mu\text{g mL}^{-1}$ . The maximum injected volume is 50  $\mu\text{L}$ , therefore the total injected mass ranges from 16  $\mu\text{g}$  - 58  $\mu\text{g}$ .

To confirm these results, we use the largest peak in the chromatogram ( $m/z$  451.2, retention time ~ 55 min) in an example. According to Claflin and Ziemann (2018), this peak is responsible for ~ 55 % of the total SOA in this system. Therefore, anywhere from 8.8  $\mu\text{g}$  - 32  $\mu\text{g}$  of the injected mass comes from that peak. However, only 0.55 % of that mass makes it to the instruments, so the instruments should observe 0.048 - 0.18  $\mu\text{g}$ .

The observed AMS mass concentration was roughly 2000  $\mu\text{g m}^{-3}$  using the corrected  $CF_x^A$ . If we assume the peak is a triangle, we can estimate the area by multiplying the observed peak mass concentration by the total peak elution time (~ 2 min on average) and dividing by 2. This value is 2000  $\mu\text{g m}^{-3} \times \text{min}$ . The AMS flow was ~ 0.1  $\text{L min}^{-1}$  or  $1 \times 10^{-4} \text{ m}^3 \text{ min}$ , so the AMS sampled ~ 0.2  $\mu\text{g}$ , which is very close to the 0.18  $\mu\text{g}$  estimated above.

These injected solution concentrations were able to produce the AMS concentrations observed in Fig. 7, Fig. S8, Fig. S10, and Fig. S12. For species with a volatility ( $C^*$ ) > 100  $\mu\text{g m}^{-3}$ , there would be substantial evaporation, > 50 % at equilibrium. While some evaporation would occur for species with a volatility < 100  $\mu\text{g m}^{-3}$ , like 4-nitrocatechol in Fig. 4, the SMPS, AMS, and EESI seem to mostly agree.

It should be noted that, in our setup, < 1 % of the injected mass made it to the mass spectrometers. The use of the collected sample could be optimized further, allowing the analysis of smaller amounts of mass by this method.

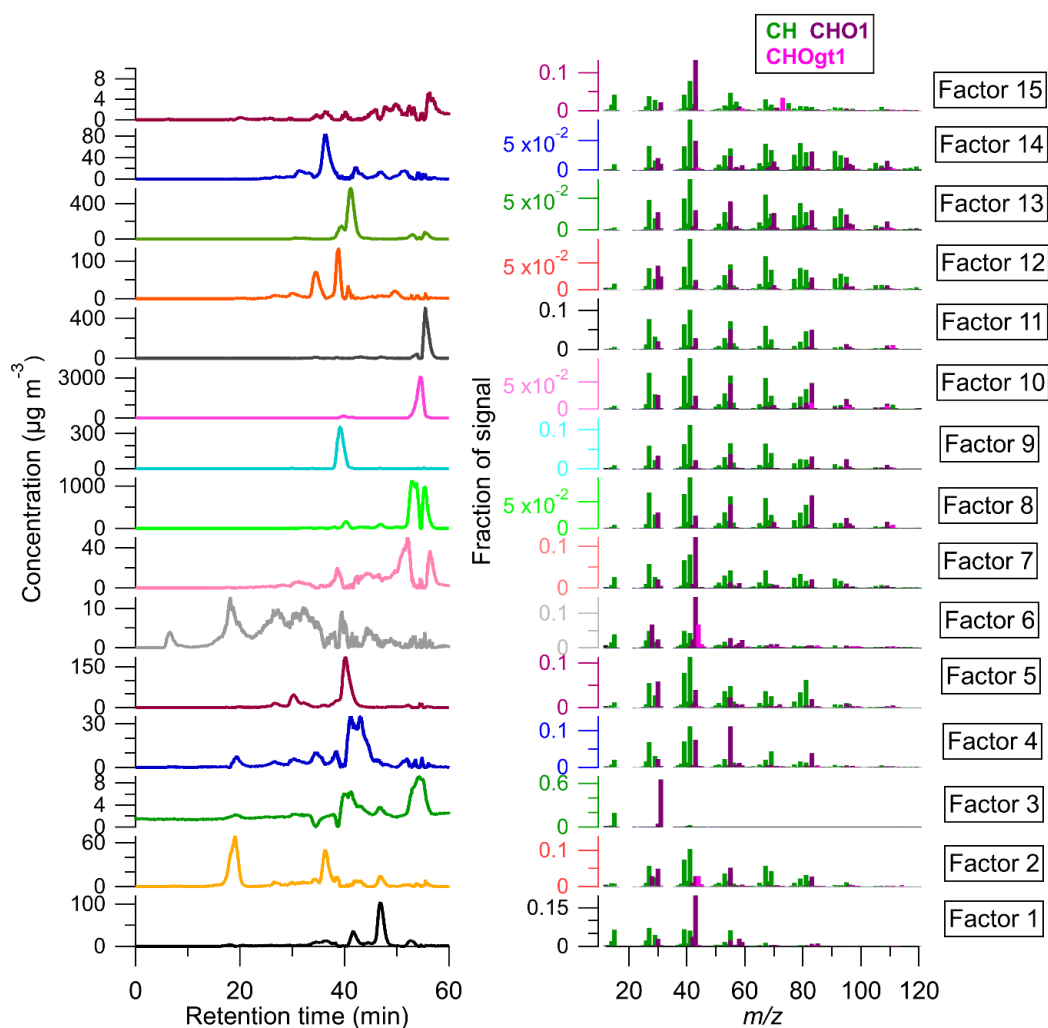

**Figure S11. (Left) time series of individual PMF factors for the  $\beta$ -pinene +  $\text{NO}_3$  SOA system and (right) HR mass spectra (colored by family) for each factor.**

Many of the factors have different time series but very similar mass spectra. This suggests that the species fragment similarly in the AMS (and likely have similar phase states). The SOA products are mostly hydrocarbons with polar moieties (nitrate, carboxylic acids, ketones, and cyclic ethers). Many of the species retained the nonpolar moiety from injection to detection (as shown in the CH dominated mass spectra).

The peaks eluting from  $\sim 35$  -  $\sim 43$  min showed the strongest overlap (and also contained many of the known  $\beta$ -pinene +  $\text{NO}_3$  SOA products). The time series for this portion of the HPLC run is shown in Fig. S12.

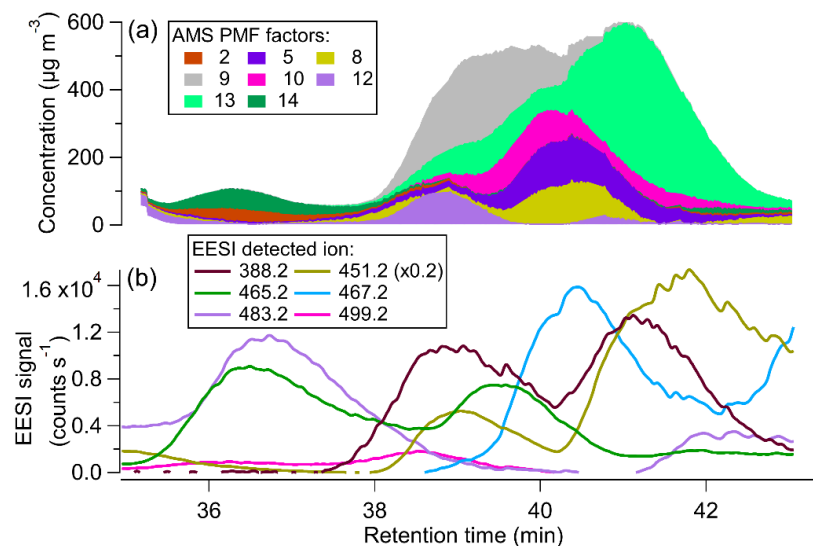

**Figure S12. (a) stacked plot of AMS PMF factors from 35 - 43 min and (b) EESI HR ions time series.**

As described in Sect. 3.3, EESI HR ions were matched to AMS PMF factors using the shape of the time series' as well as the retention times. The EESI HR ions and associated AMS PMF factors are shown in Table S7.

**Table S7. EESI HR ion and corresponding AMS PMF factor(s)**

| EESI HR ion | Associated AMS PMF factor(s) |
|-------------|------------------------------|
| 268.1       | -                            |
| 388.2       | 9, 13                        |
| 451.2 (1)   | 13                           |
| 451.2 (2)   | 13                           |
| 451.2 (3)   | -                            |
| 465.2 (1)   | 2                            |
| 465.2 (2)   | 10                           |
| 467.2       | 5,8                          |
| 483.2       | 14                           |

Individual peaks are shown in Fig. S13.

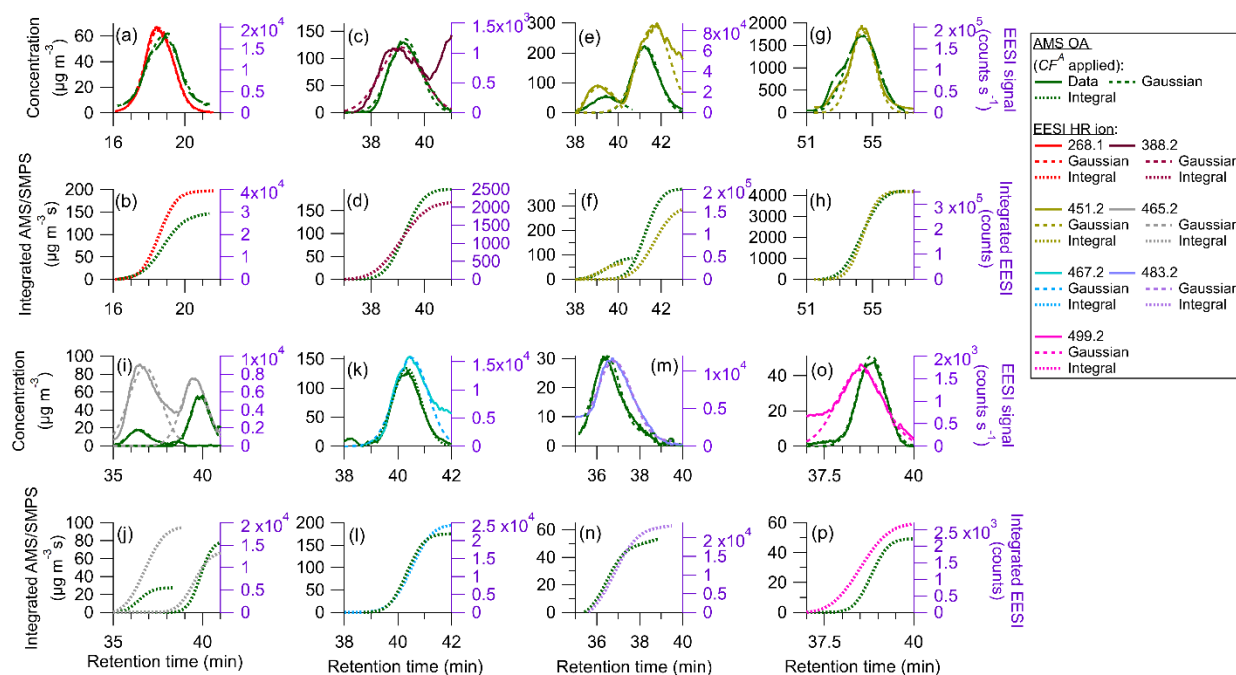

**Figure S13. (a)  $m/z$  268.1 Gaussians, (b) integrals; (c)  $m/z$  388.2 Gaussians, (d) integrals; (e) one peak for  $m/z$  451.2 Gaussians, (f) integrals; (g) one peak for  $m/z$  451.2 Gaussians, (h) integrals; (i)  $m/z$  465.2 Gaussians, (j) integrals; (k)  $m/z$  467.2 Gaussians, (l) integrals; (m) one peak for  $m/z$  483.2 Gaussians, (n) integrals; (o)  $m/z$  499.2 Gaussians, (p) integrals. For the EESI HR ions, the total mass (OA + NO<sub>3</sub>) was used in the denominator.**

Not every peak observed in Claflin and Ziemann (2018) was identified here, which is likely due to lack of EESI sensitivity to some species and potential decomposition of SOA products (specifically for the trimer identified in Claflin and Ziemann (2018)). In contrast, some EESI HR ions that do not correspond to peaks identified in Claflin and Ziemann (2018) were detected here, but structures for those species are unknown. All identified individual peaks are shown in Fig. S13. As described in Sect. 2.7,  $CF_x^E$  was determined either using the measured SMPS mass or the total AMS mass (OA + NO<sub>3</sub>). Fig. S13 shows the AMS OA mass, which was separated by PMF. As shown in Fig. S3, the NO<sub>3</sub> contribution to the total mass was  $\sim 5\%$ . This contribution was added to the denominator to calculate  $CF_x^E$  which are reported in table 2 in the main text.

## 264    **References**

- 265    Boyd, C. M., J. Sanchez, L. Xu, a. J. Eugene, T. Nah, W. Y. Tuet, M. I. Guzman, and N. L. Ng. 2015. "Secondary  
266    Organic Aerosol Formation from the  $\beta$ -Pinene+NO<sub>3</sub> System: Effect of Humidity and Peroxy Radical Fate."  
267    *Atmospheric Chemistry and Physics* 15 (13): 7497–7522.
- 268    Claflin, M. S. and Ziemann, P. J.: Identification and Quantitation of Aerosol Products of the Reaction of  $\beta$ -Pinene  
269    with NO<sub>3</sub> Radicals and Implications for Gas- and Particle-Phase Reaction Mechanisms, *J. Phys. Chem. A*, 122(14),  
270    3640–3652, doi:10.1021/acs.jpca.8b00692, 2018.
- 271    Collins, D. R., Flagan, R. C. and Seinfeld, J. H.: Improved inversion of scanning DMA data, *Aerosol Sci. Technol.*,  
272    36(1), 1–9, doi:10.1080/02786820275339032, 2002.
- 273    DeCarlo, P. F., Dunlea, E. J., Kimmel, J. R., Aiken, A. C., Sueper, D., Crounse, J., Wennberg, P. O., Emmons, L.,  
274    Shinozuka, Y., Clarke, A. and Others: Fast airborne aerosol size and chemistry measurements above Mexico City  
275    and Central Mexico during the MILAGRO campaign, 1foldr Import 2019-10-08 Batch 1 [online] Available from:  
276    <https://oaktrust.library.tamu.edu/bitstream/handle/1969.1/178622/document-2.pdf?sequence=2>, 2008.
- 277    Huffman, J. A., Jayne, J. T., Drewnick, F., Aiken, A. C., Onasch, T., Worsnop, D. R. and Jimenez, J. L.: Design,  
278    Modeling, Optimization, and Experimental Tests of a Particle Beam Width Probe for the Aerodyne Aerosol Mass  
279    Spectrometer, *Aerosol Sci. Technol.*, 39(12), 1143–1163, doi:10.1080/02786820500423782, 2005.
- 280    Jayne, J. T., Leard, D. C., Zhang, X., Davidovits, P., Smith, K. A., Kolb, C. E. and Worsnop, D. R.: Development of  
281    an Aerosol Mass Spectrometer for Size and Composition Analysis of Submicron Particles, *Aerosol Sci. Technol.*,  
282    33(1-2), 49–70, doi:10.1080/027868200410840, 2000.
- 283    Jeong, C.-H. and Evans, G. J.: Inter-Comparison of a Fast Mobility Particle Sizer and a Scanning Mobility Particle  
284    Sizer Incorporating an Ultrafine Water-Based Condensation Particle Counter, *Aerosol Sci. Technol.*, 43(4), 364–  
285    373, doi:10.1080/02786820802662939, 2009.
- 286    Krechmer, J. E., Day, D. A., Ziemann, P. J. and Jimenez, J. L.: Direct Measurements of Gas/Particle Partitioning  
287    and Mass Accommodation Coefficients in Environmental Chambers, *Environ. Sci. Technol.*, 51(20), 11867–11875,  
288    doi:10.1021/acs.est.7b02144, 2017.
- 289    Malloy, Q. G. J., Nakao, S., Qi, L., Austin, R., Stothers, C., Hagino, H. and Cocker, D. R.: Real-Time Aerosol  
290    Density Determination Utilizing a Modified Scanning Mobility Particle Sizer—Aerosol Particle Mass Analyzer  
291    System, *Aerosol Sci. Technol.*, 43(7), 673–678, doi:10.1080/02786820902832960, 2009.
- 292    McMurtry, P. H.: A review of atmospheric aerosol measurements, *Atmos. Environ.*, 34(12), 1959–1999,  
293    doi:10.1016/S1352-2310(99)00455-0, 2000.
- 294    Pagonis, D., Campuzano-Jost, P., Guo, H., Day, D. A., Schueneman, M. K., Brown, W. L., Nault, B. A., Stark, H.,  
295    Siemens, K., Laskin, A., Piel, F., Tomsche, L., Wisthaler, A., Coggon, M. M., Gkatzelis, G. I., Halliday, H. S.,  
296    Krechmer, J. E., Moore, R. H., Thomson, D. S., Warneke, C., Wiggins, E. B. and Jimenez, J. L.: Airborne extractive  
297    electrospray mass spectrometry measurements of the chemical composition of organic aerosol, *Atmospheric*  
298    *Measurement Techniques*, 14(2), 1545–1559, doi:10.5194/amt-14-1545-2021, 2021.
- 299    Russell, L. M., Flagan, R. C. and Seinfeld, J. H.: Asymmetric Instrument Response Resulting from Mixing Effects  
300    in Accelerated DMA-CPC Measurements, *Aerosol Sci. Technol.*, 23(4), 491–509,  
301    doi:10.1080/02786829508965332, 1995.
- 302    Sinclair, D. and La Mer, V. K.: Light scattering as a measure of particle size in aerosols; the production of  
303    monodisperse aerosols, *Chem. Rev.*, 44(2), 245–267, doi:10.1021/cr60138a001, 1949.
- 304    Sioutas, C.: Evaluation of the Measurement Performance of the Scanning Mobility Particle Sizer and Aerodynamic  
305    Particle Sizer, *Aerosol Sci. Technol.*, 30(1), 84–92, doi:10.1080/027868299304903, 1999.
- 306

- 307 Ulbrich, I. M., Canagaratna, M. R., Zhang, Q., Worsnop, D. R. and Jimenez, J. L.: Interpretation of organic  
308 components from positive matrix factorization of aerosol mass spectrometric data, *Atmospheric Chemistry &*  
309 *Physics*, 9(9) [online] Available from: <https://d-nb.info/114970523X/34>, 2009.
- 310 Wang, S. C. and Flagan, R. C.: Scanning Electrical Mobility Spectrometer, *Aerosol Sci. Technol.*, 13(2), 230–240,  
311 doi:10.1080/02786829008959441, 1990.
